# Supplementary material for: Highly portable fluorescent turn-on sensor for sulfide anions based on silicon nanowires
Source: Royal Society of Chemistry journal article supplement (doi:10.1039/c4ra10963e), 2014-01-01
Supplement: c4ra10963e1.pdf [file c4ra10963e1.pdf]

## Supplementary Information

### Highly portable fluorescent turn-on sensor for Sulfide Anions based on Silicon nanowires

Huimin Wang,<sup>a,b</sup> Lixuan Mu,<sup>a</sup> Liangliang Jin,<sup>a,b</sup> Guangwei She,<sup>a</sup> Haitao Xu<sup>a</sup> and  
Wensheng Shi<sup>\*a</sup>

<sup>a</sup>Key Laboratory of Photochemical Conversion and Optoelectronic Materials, Technical  
Institute of Physics and Chemistry, Chinese Academy of Sciences, Beijing 100190, China

Tel: +86-10-82543513, Fax: +86-10-82543513, Email: shiws@mail.ipc.ac.cn

<sup>b</sup>University of Chinese Academy of Sciences, Beijing 100190, China

**Table S1.** Samples investigated by TGA

| Sample    | Mass loss (%) | M (organic. residues)<br>[g mol <sup>-1</sup> ] |
|-----------|---------------|-------------------------------------------------|
| SiNWs     | 2.4           | -                                               |
| 4-A-SiNWs | 36.8          | 415.21                                          |

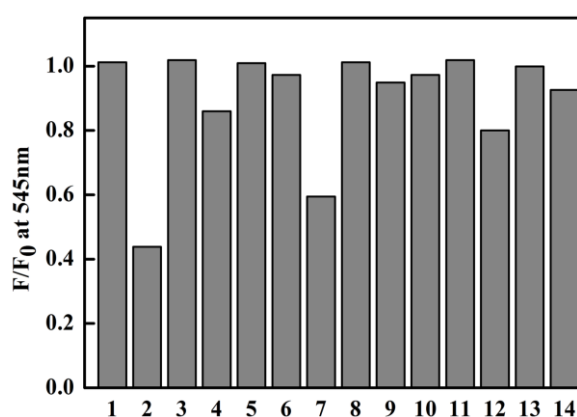

**Fig. S1** Relative fluorescence intensity of 4-A-SiNWs (50 μg/mL) in the presence of 10 μM various metal ions. HEPES buffer (pH=7.0).  $\lambda_{\text{ex}}=430\text{nm}$ ,  $\lambda_{\text{em}}=545\text{nm}$ . 1-14 is

successively for blank,  $\text{Cu}^{2+}$ ,  $\text{Ca}^{2+}$ ,  $\text{Cd}^{2+}$ ,  $\text{Mg}^{2+}$ ,  $\text{Al}^{3+}$ ,  $\text{Co}^{2+}$ ,  $\text{Na}^+$ ,  $\text{Hg}^{2+}$ ,  $\text{Mn}^{2+}$ ,  $\text{K}^+$ ,  $\text{Ni}^{2+}$ ,  $\text{Pb}^{2+}$ ,  $\text{Zn}^{2+}$ .

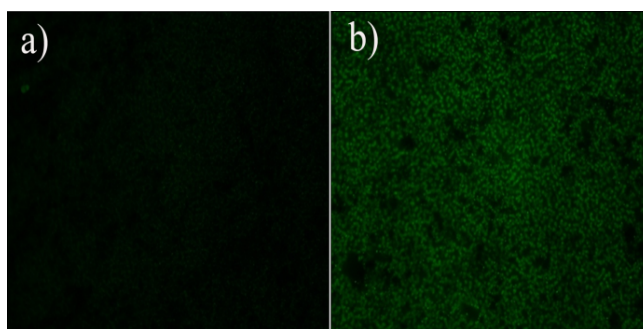

**Fig. S2** Fluorescence images of the SiNW arrays based sensor before a) and b) after being treated with  $\text{H}_2\text{S}$  gas for 1 minute. The sensor prewetted with water was placed in a conical flask, then the  $\text{H}_2\text{S}$  gas produced by ferrous sulfide and dilute sulphuric acid was introduced into the system.
